# Supplementary material
Source: PubMed Central journal article supplement (PMC2077274)

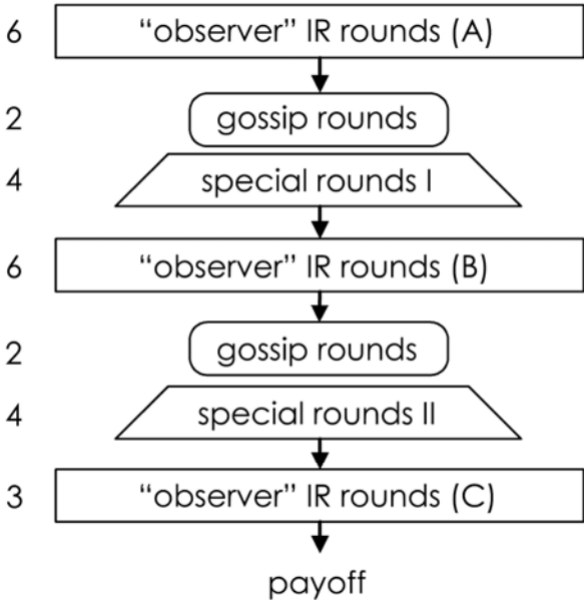

Supplement: pnas_0704598104_1.pdf [file pnas_0704598104_1.pdf]
